# Supplementary material for: Construction and screening of 2-aryl benzimidazole library identifies a new antifouling and antifungal agent
Source: Royal Society of Chemistry journal article supplement (doi:10.1039/c4ra00860j), 2014-01-01
Supplement: c4ra00860j1.pdf [file c4ra00860j1.pdf]

## **Construction and screening of 2-aryl benzimidazole library identifies a new antifouling and antifungal agent**

Mahesh S. Majik<sup>a\*</sup>, Supriya Tilvi<sup>a</sup>, Stacey Mascarenhas<sup>a</sup>, Vikash Kumar<sup>b</sup>, Amrita Chatterjee<sup>b</sup>, Mainak Banerjee<sup>b\*</sup>

*<sup>a</sup>Bio-organic Chemistry Laboratory, CSIR-National Institute of Oceanography, Dona-Paula Goa 403 004, India; <sup>b</sup>Department of Chemistry, BITS, Pilani- K. K. Birla Goa Campus, Zuarinagar, Goa 403726, India.*

\*Corresponding author. Email: [mmajik@nio.org](mailto:mmajik@nio.org) (MSM); [mainak@goa.bits-pilani.ac.in](mailto:mainak@goa.bits-pilani.ac.in) (MB)

### **Supporting Information**

**Results of antifouling activity of synthesized 2-aryl benzimidazole library.....S2**

**Results of antifungal activity of synthesized 2-aryl benzimidazole library.....S3**

**Results of antifouling activity of synthesized 2-aryl benzimidazole library:**

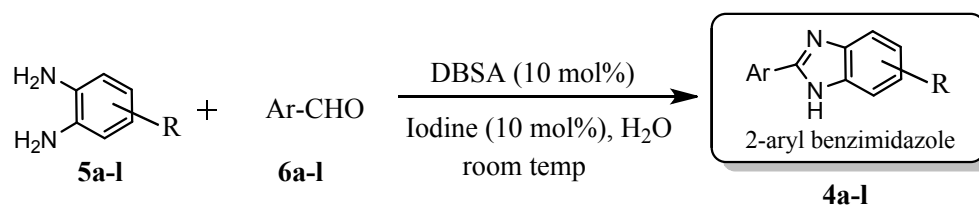

| Entry | 4a-l     | R                 | Ar                                               | Yield (%) |
|-------|----------|-------------------|--------------------------------------------------|-----------|
| 1     | <b>a</b> | H                 | Ph                                               | 92        |
| 2     | <b>b</b> | H                 | 4-NO <sub>2</sub> C <sub>6</sub> H <sub>4</sub>  | 94        |
| 3     | <b>c</b> | 4-CH <sub>3</sub> | 4-NO <sub>2</sub> C <sub>6</sub> H <sub>4</sub>  | 93        |
| 4     | <b>d</b> | 4-Cl              | 4-NO <sub>2</sub> C <sub>6</sub> H <sub>4</sub>  | 90        |
| 5     | <b>e</b> | 4-NO <sub>2</sub> | 4-OCH <sub>3</sub> C <sub>6</sub> H <sub>4</sub> | 92        |
| 6     | <b>f</b> | H                 | 4-BrC <sub>6</sub> H <sub>4</sub>                | 87        |
| 7     | <b>g</b> | H                 | Furan-2-yl                                       | 80        |
| 8     | <b>h</b> | 4-CH <sub>3</sub> | Furan-2-yl                                       | 81        |
| 9     | <b>i</b> | 4-NO <sub>2</sub> | Furan-2-yl                                       | 83        |
| 10    | <b>j</b> | 4-NO <sub>2</sub> | Pyrrole-2-yl                                     | 88        |
| 11    | <b>k</b> | 4-NO <sub>2</sub> | Thiophene-2-yl                                   | 86        |
| 12    | <b>l</b> | H                 | C <sub>6</sub> H <sub>5</sub> CH=CH-             | 86        |

**Table 1:** Antifouling activity<sup>a,b,c</sup> using Kirby-Bauer disc diffusion method.

| Compounds                                               | Inhibition diameter in mm |    |    |    |    |    |    |    |    |           |    |           | std       |
|---------------------------------------------------------|---------------------------|----|----|----|----|----|----|----|----|-----------|----|-----------|-----------|
|                                                         | 4a                        | 4b | 4c | 4d | 4e | 4f | 4g | 4h | 4i | 4j        | 4k | 4l        |           |
| <i>Alcanivorax spp.</i>                                 | -                         | -  | -  | -  | -  | 2  | -  | 4  | -  | <b>12</b> | -  | <b>12</b> | <b>9</b>  |
| <i>Planococcus donghaensis</i>                          | -                         | -  | -  | -  | -  | -  | -  | 6  | -  | <b>14</b> | -  | <b>11</b> | <b>4</b>  |
| <i>Aeromonas hydrophila subsp. hydrophila ATCC 7966</i> | -                         | -  | -  | -  | -  | -  | -  | -  | -  | <b>6</b>  | -  | <b>1</b>  | <b>6</b>  |
| <i>Aeromonas hydrophila subsp. salmonicida A449</i>     | -                         | -  | -  | 1  | -  | 1  | -  | 4  | -  | <b>12</b> | -  | <b>14</b> | <b>16</b> |
| <i>Erythrobacter litoralis</i>                          | -                         | -  | -  | -  | -  | 1  | -  | 4  | 1  | <b>10</b> | -  | <b>11</b> | <b>15</b> |
| <i>Alcanivorax borkumensis</i>                          | -                         | -  | -  | -  | -  | 1  | -  | 4  | -  | <b>10</b> | -  | <b>8</b>  | <b>9</b>  |
| <i>Pseudomonas mendocina</i>                            | -                         | -  | -  | -  | -  | 1  | -  | 4  | 1  | <b>12</b> | -  | <b>8</b>  | <b>11</b> |
| <i>Allivibrio salmonicida</i>                           | -                         | -  | -  | -  | -  | 3  | -  | -  | -  | <b>10</b> | -  | <b>9</b>  | <b>6</b>  |
| <i>Pseudoalteromonas spp.</i>                           | -                         | -  | -  | -  | -  | -  | -  | -  | -  | -         | -  | -         | <b>6</b>  |
| <i>Vibrio furnisii</i>                                  | -                         | -  | -  | -  | -  | 1  | -  | 4  | -  | <b>11</b> | -  | <b>8</b>  | <b>12</b> |

<sup>a</sup>The data are expressed as the measure of inhibition zone (mm) at concentration 100 µg/disc. <sup>b</sup>(-) = no antifouling activity was observed. <sup>c</sup>data given are the mean of three replicates and the standard used in present study is Gentamycin antibiotic.

**Table 2:** Results of Anti-fungal assay (Clinical fungi)<sup>a</sup>

| <b>Compounds</b><br>(100µg/disc) | <i>Aspergillus fumigatus</i> | <i>Rhodotorulla sp.</i> | <i>Candida albicans</i> | <i>Aspergillus niger</i> | <i>Cryptococcus neoformans</i> |
|----------------------------------|------------------------------|-------------------------|-------------------------|--------------------------|--------------------------------|
| <b>4g</b>                        | 1                            | 4                       | -                       | <b>12</b>                | -                              |
| <b>4h</b>                        | 1                            | 3                       | -                       | 6                        | <b>8</b>                       |
| <b>4i</b>                        | -                            | -                       | <b>6</b>                | 4                        | -                              |
| <b>4j</b>                        | -                            | -                       | <b>6</b>                | -                        | -                              |
| <b>4l</b>                        | <b>9</b>                     | 2                       | 2                       | 6                        | 2                              |
| Standard Antibiotic (50µg/disc)  | <b>12</b>                    | <b>9</b>                | <b>10</b>               | <b>13</b>                | <b>9</b>                       |

<sup>a</sup>The data are expressed as the measure of inhibition zone (mm) at concentration; data given are the mean of three replicates and the standard used in present study is penicillin antibiotic.
